# Supplementary material for: Phenylketonuria (PKU) Urinary Metabolomic Phenotype Is Defined by Genotype and Metabolite Imbalance: Results in 51 Early Treated Patients Using Ex Vivo 1H-NMR Analysis
Source: MDPI journal article supplement (doi:10.3390/molecules28134916), 2023-06-22
Supplement: s1 [file s1]

# **Phenylketonuria (PKU) Urinary Metabolomic Phenotype Is Defined by Genotype and Metabolite Imbalance: Results in 51 Early Treated Patients Using Ex Vivo $^1\text{H}$ -NMR Analysis**

**Claire Cannet <sup>1</sup>, Allan Bayat <sup>2</sup>, Georg Frauendienst-Egger <sup>3</sup>, Peter Freisinger <sup>3</sup>, Manfred Spraul <sup>1</sup>, Nastassja Himmelreich <sup>4</sup>, Musa Kockaya <sup>5</sup>, Kirsten Ahring <sup>2</sup>, Markus Godejohann <sup>1</sup>, Anita MacDonald <sup>6</sup> and Friedrich Trefz <sup>7,\*</sup>**

<sup>1</sup> Bruker Biospin, 76275 Ettlingen, Germany; [claire.cannet@bruker.com](mailto:claire.cannet@bruker.com) (C.C.)

<sup>2</sup> Kennedy Centre, Center for PKU, 2600 Glostrup, Denmark

<sup>3</sup> Department of Pediatrics, School of Medicine, University of Tübingen, 72074 Tübingen, Germany

<sup>4</sup> CEGAT, Human Genetic Institute, 72076 Tübingen, Germany

<sup>5</sup> Private Pediatric Practice, 68307 Mannheim, Germany

<sup>6</sup> Dietetic Department, Birmingham Children's Hospital, Birmingham B4 6NH, UK

<sup>7</sup> Metabolic Consulting Reutlingen, 72766 Reutlingen, Germany

\* Correspondence: [friedrich.trefz@metabolic-consulting.de](mailto:friedrich.trefz@metabolic-consulting.de)

**Supplementary Table S1.** List of metabolites as measured by the ex vivo  $^1\text{H}$ -NMR analysis in urine.

| NMR-Metabolites (n=149) |                                 |     |                             |     |                                |
|-------------------------|---------------------------------|-----|-----------------------------|-----|--------------------------------|
| 1                       | Creatinine                      | 51  | Leucine                     | 101 | 2-Hydroxyphenylacetic acid     |
| 2                       | 1-Methylguanidine               | 52  | 4-Pyridoxic acid            | 102 | Benzoic acid                   |
| 3                       | Dimethylamine                   | 53  | Adenine                     | 103 | L-Pyroglutamic acid            |
| 4                       | Alanine                         | 54  | Acetoacetic acid            | 104 | 2-Methylsuccinic acid          |
| 5                       | Betaine                         | 55  | Thymol                      | 105 | Myo-Inositol                   |
| 6                       | Glycine                         | 56  | L-Fucose                    | 106 | Glutamine                      |
| 7                       | Guanidinoacetic acid            | 57  | Propylene glycol            | 107 | DL-Alloisoleucine              |
| 8                       | N,N-Dimethylglycine             | 58  | L-Tryptophan                | 108 | N-Acetylglutamate              |
| 9                       | N-Acetylaspartic acid           | 59  | Uracil                      | 109 | D-Galactonic acid              |
| 10                      | Valine                          | 60  | Phenylalanine               | 110 | 4-Hydroxyphenyllactic acid     |
| 11                      | Syringic acid                   | 61  | Phenylpyruvic acid          | 111 | Paracetamol                    |
| 12                      | Acetic acid                     | 62  | Ethylmalonic acid           | 112 | Succinylacetone                |
| 13                      | Citric acid                     | 63  | Xanthurenic acid            | 113 | Galactitol                     |
| 14                      | Formic acid                     | 64  | Phenylacetic acid           | 114 | Glycerol                       |
| 15                      | Fumaric acid                    | 65  | Glutaric acid               | 115 | Isopropanol                    |
| 16                      | Lactic acid                     | 66  | Propionic acid              | 116 | 3-Methylcrotonylglycine        |
| 17                      | Succinic acid                   | 67  | Citrulline                  | 117 | Cystine                        |
| 18                      | Tartaric acid                   | 68  | 2-Oxoglutaric acid          | 118 | 3-Hydroxyvaleric acid          |
| 19                      | Pantothenic acid                | 69  | Sarcosine                   | 119 | L-Threonic acid                |
| 20                      | 3-Hydroxyisovaleric acid        | 70  | 3-Hydroxyglutaric acid      | 120 | Tyramine                       |
| 21                      | 3-Methylglutaconic acid         | 71  | 3-Phenyllactic acid         | 121 | N-Acetylphenylalanine          |
| 22                      | L-Citramalic acid               | 72  | 4-Hydroxyphenylacetic acid  | 122 | 2-Oxoisovaleric acid           |
| 23                      | Glycolic acid                   | 73  | L-Isoleucine                | 123 | Ethanol                        |
| 24                      | Acetone                         | 74  | 2-Hydroxyisovaleric acid    | 124 | Propionylglycine               |
| 25                      | Pyruvic acid                    | 75  | Uridine                     | 125 | 5-Aminolevulinic acid          |
| 26                      | 1-Methylhydantoin               | 76  | 3-Methyl-2-oxovaleric acid  | 126 | Paracetamol-glucuronide        |
| 27                      | 1-Methylnicotinamide            | 77  | N-Isovaleroylglycine        | 127 | 2-Hydroxy-4-methylvaleric acid |
| 28                      | 2PY plus 4PY                    | 78  | Imidazole                   | 128 | 2-Ketobutyric acid             |
| 29                      | Caffeine                        | 79  | D-Galactose                 | 129 | Argininosuccinic acid          |
| 30                      | Inosine                         | 80  | 3-Hydroxybutyric acid       | 130 | Glutamic acid                  |
| 31                      | Neopterin                       | 81  | Methylmalonic acid          | 131 | N-Acetyltyrosine               |
| 32                      | Orotic acid                     | 82  | 2-Furoylglycine             | 132 | 4-Ethylphenol                  |
| 33                      | Oxypurinol                      | 83  | 4-Aminobutyric acid         | 133 | D-Panthenol                    |
| 34                      | Theobromine                     | 84  | 2-Oxoisocaproic acid        | 134 | 5-Aminopentanoic acid          |
| 35                      | D-Glucose                       | 85  | Thymine                     | 135 | Isobutyrylglycine              |
| 36                      | D-Lactose                       | 86  | 3-Hydroxypropionic acid     | 136 | L-Carnosine                    |
| 37                      | Methanol                        | 87  | Choline                     | 137 | L-Homocystine                  |
| 38                      | Trimethylamine                  | 88  | Cytosine                    | 138 | 4-Aminohippuric acid           |
| 39                      | Arginine                        | 89  | D-Gluconic acid             | 139 | Pyrocatechol                   |
| 40                      | Taurine                         | 90  | Methionine                  | 140 | E-Glutaconic acid              |
| 41                      | Hippuric acid                   | 91  | 4-Hydroxyhippuric acid      | 141 | L-Ascorbic acid                |
| 42                      | Maleic acid                     | 92  | Butyric acid                | 142 | Citraconic acid                |
| 43                      | Trigonelline                    | 93  | D-Mannose                   | 143 | Pimelic acid                   |
| 44                      | Oxaloacetic acid                | 94  | Tiglylglycine               | 144 | Malic acid                     |
| 45                      | 1,3-Dimethyluric acid           | 95  | 1-Methylhistidine           | 145 | Acetoin                        |
| 46                      | Proline betaine                 | 96  | Dihydrouracil               | 146 | DL-Kynurenin                   |
| 47                      | Allantoin                       | 97  | 4-Hydroxyphenylpyruvic acid | 147 | 1-Methyladenosine              |
| 48                      | Dihydrothymine                  | 98  | D-Mandelic acid             | 148 | Adenosine                      |
| 49                      | Creatine                        | 99  | D-Mannitol                  | 149 | Quinolinic acid                |
| 50                      | 3-Hydroxy-3-methylglutaric acid | 100 | 3-Aminoisobutyric acid      |     |                                |

**Supplementary Figure S1.** UPLC chromatogram (A) and NMR (B) revealing two metabolites (quantified as “Allopurinol”): Peak #1: *N*-methyl-2-pyridone-5-carboxamide and Peak #2: *N*1-Methyl-4-pyridone-5-carboxamide using Heteronuclear Multiple Bond Correlation.

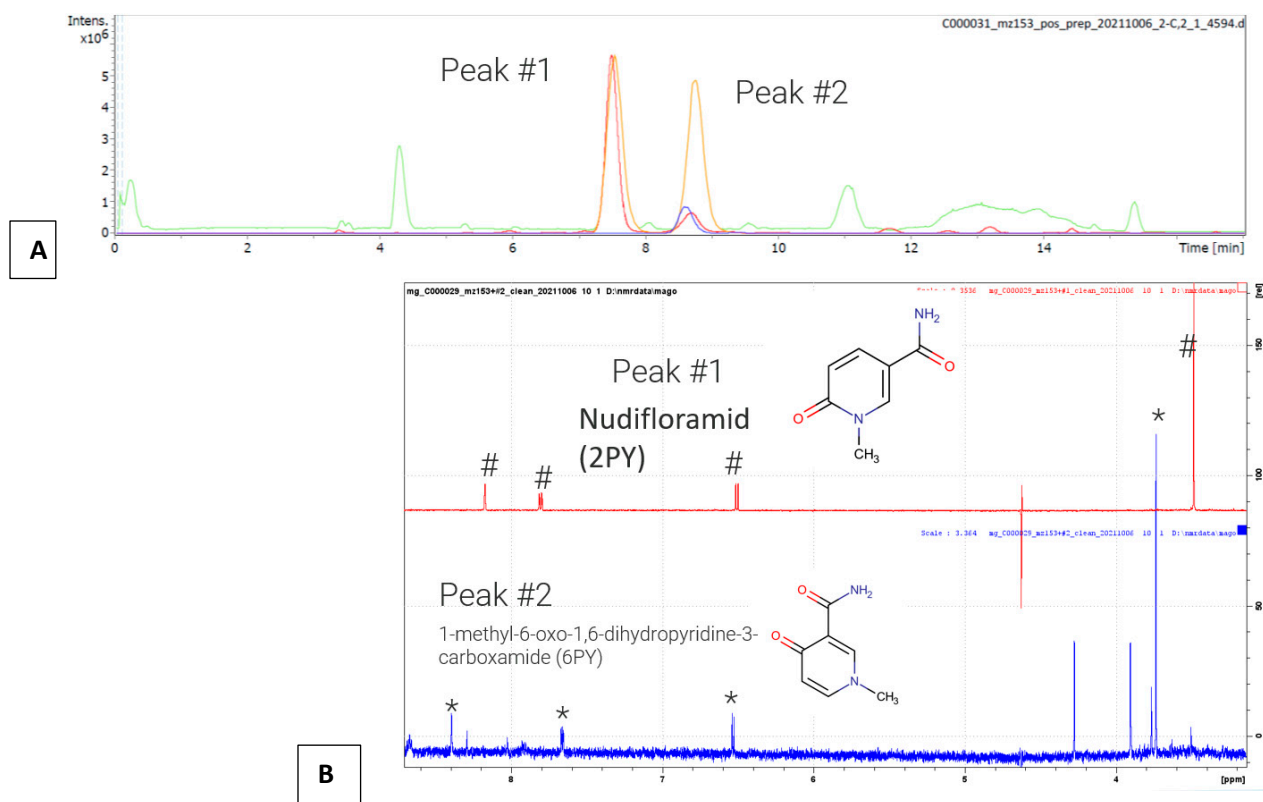

**Supplementary Figure S2.** Summary of statistical analysis for 24 metabolites of age-matched healthy controls (HEA;  $n=51$ ) and patients with phenylketonuria (PKU;  $n=51$ ). Mann Whitney U-test, box blot showing median and 95<sup>th</sup> percentile values in urine (mmol/mol creatinine).

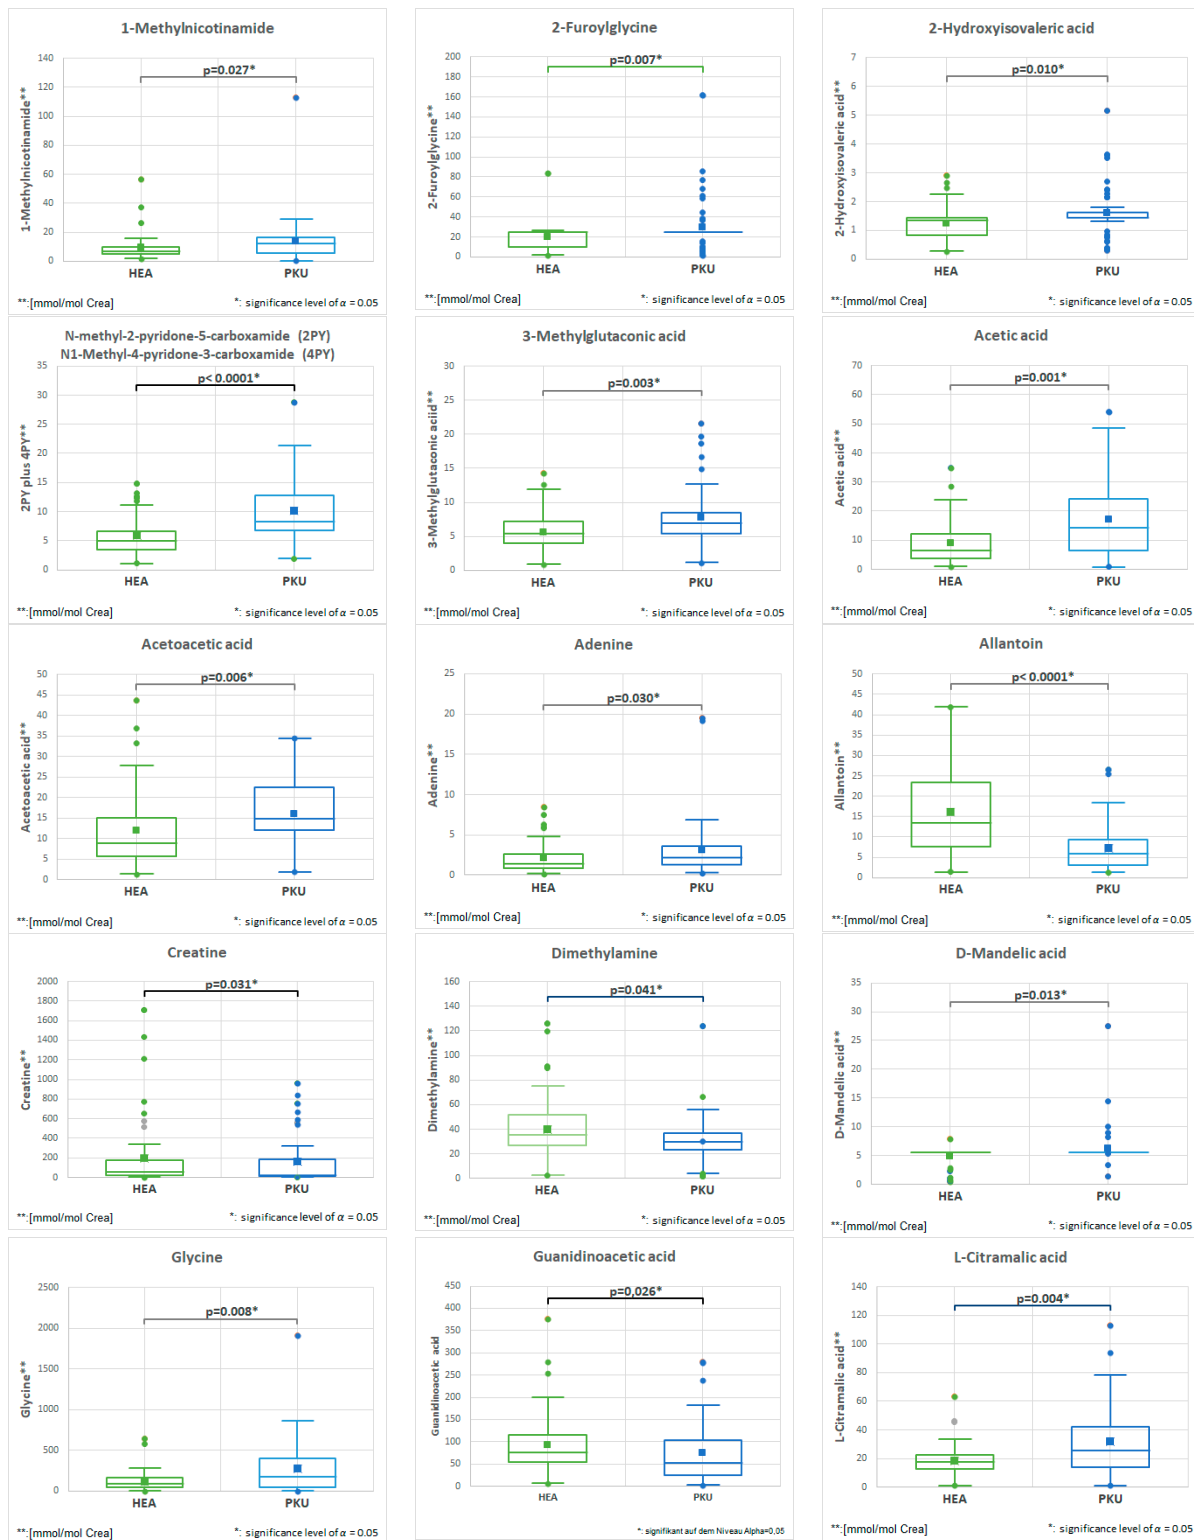

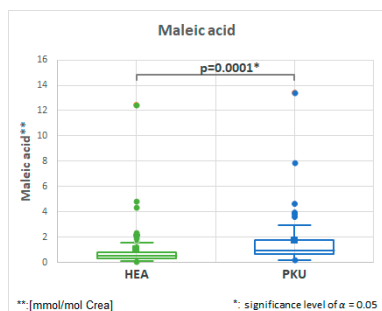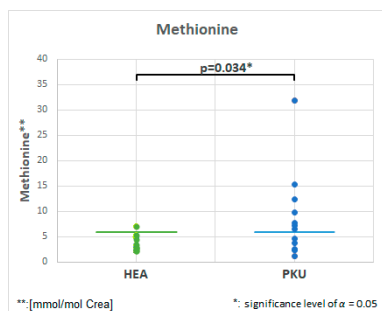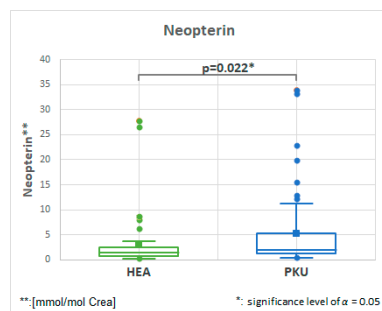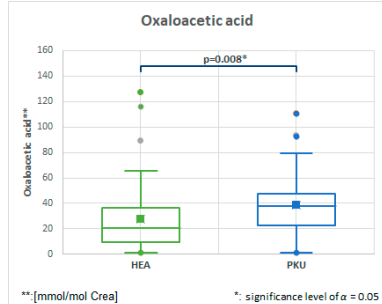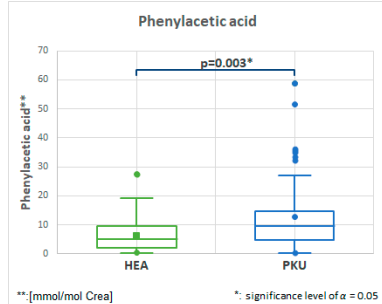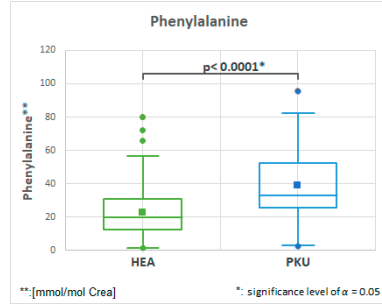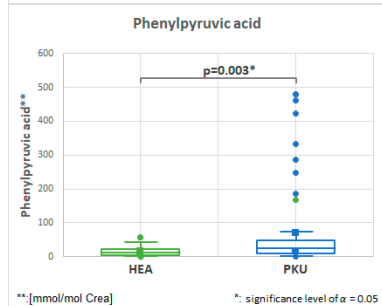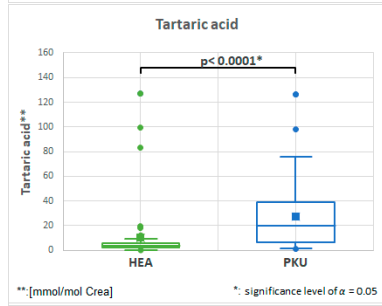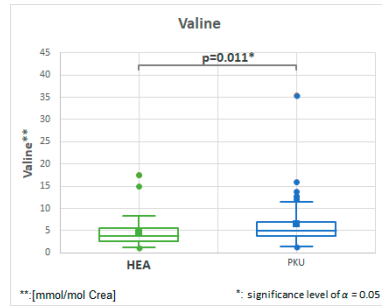

**Supplementary Figure S3.** Regression analysis of 24 metabolites with age in age-matched healthy controls (HEA, red;  $n=51$ ) and patients with phenylketonuria (PKU, blue;  $n=51$ ). Significant differences between groups (HEA/PKU) and regression “Age” are shown in red.

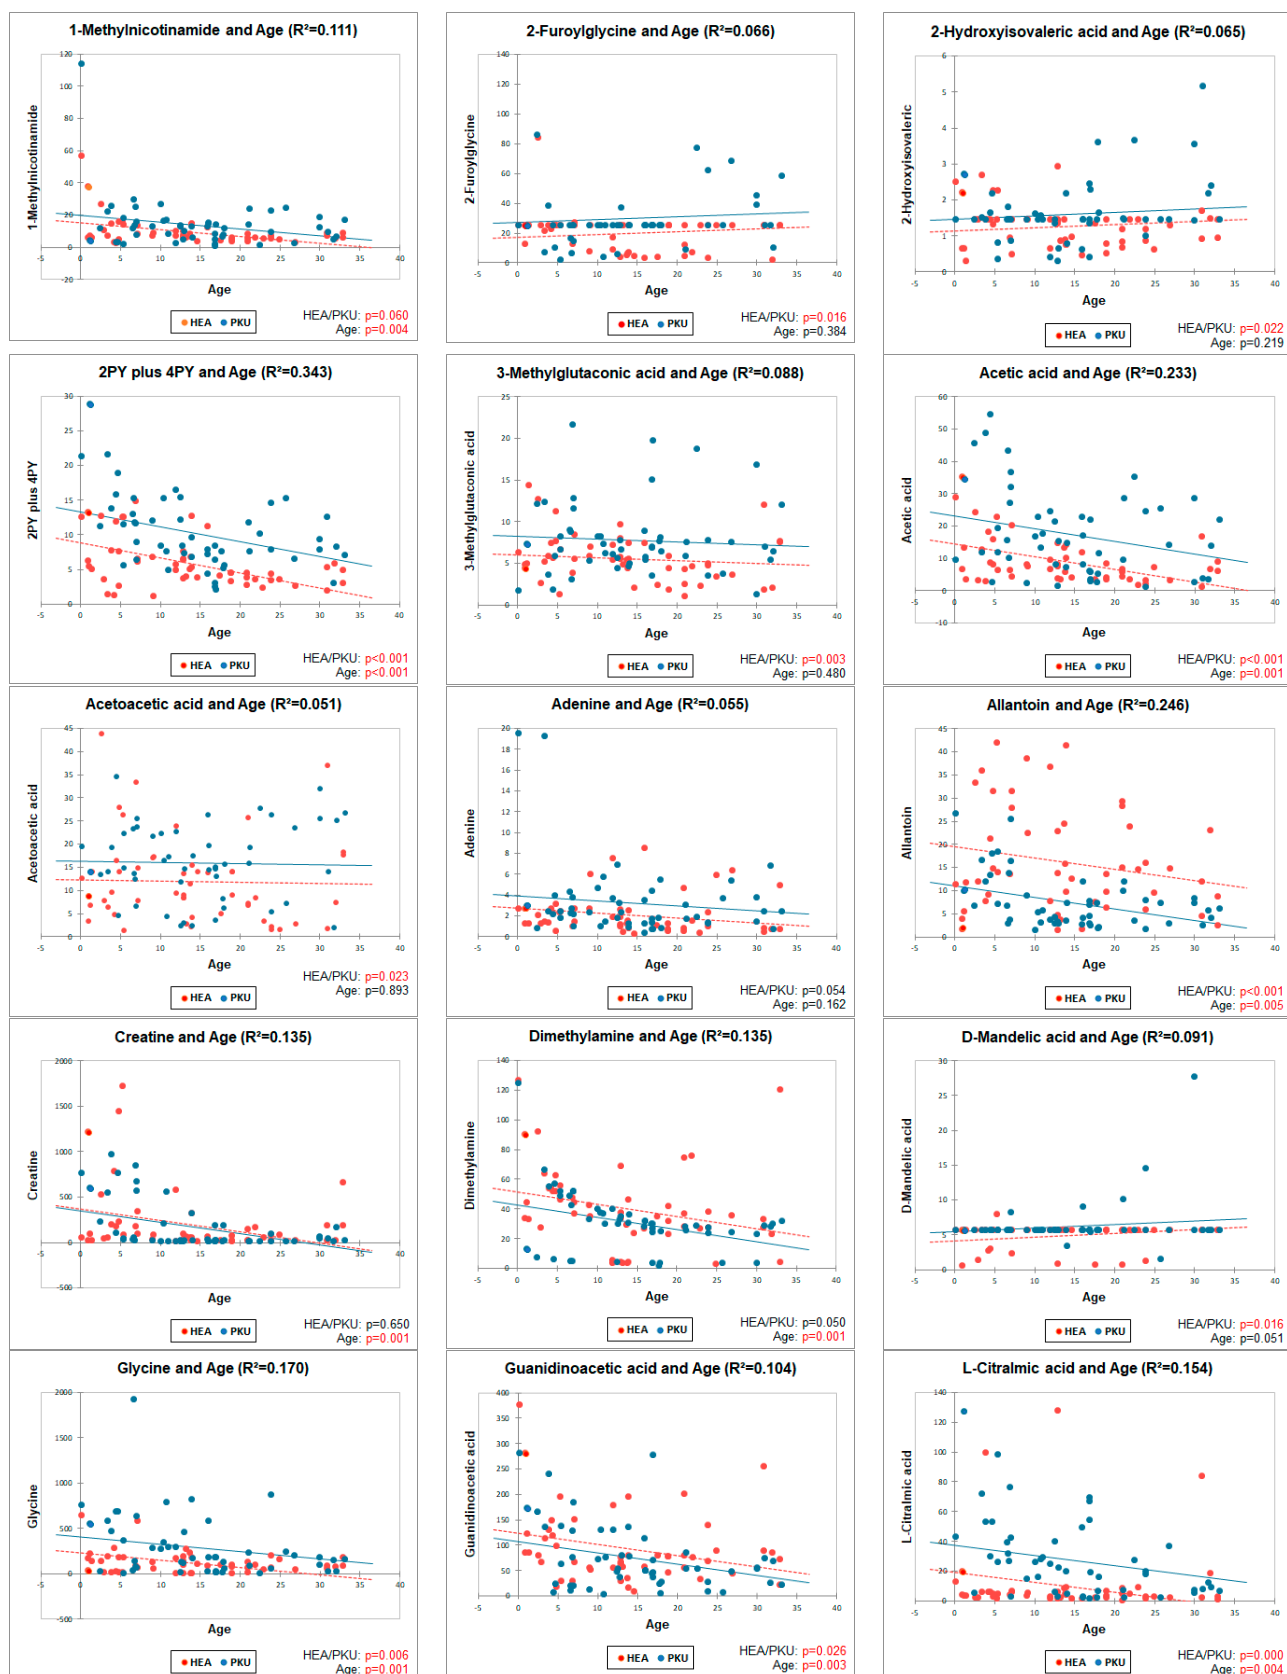

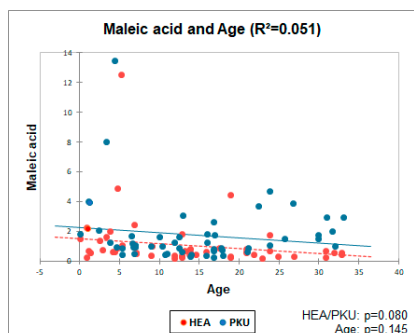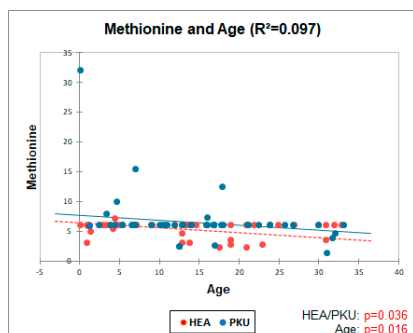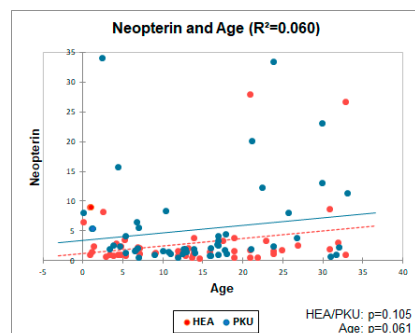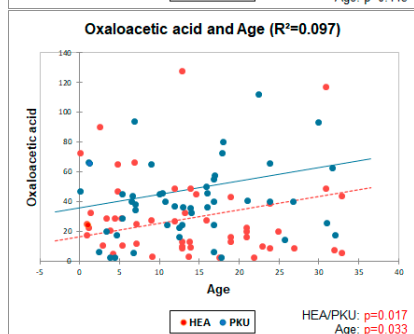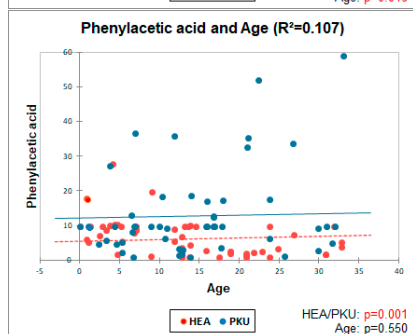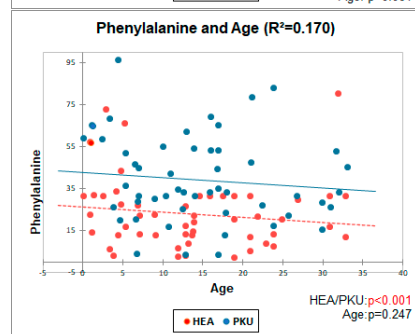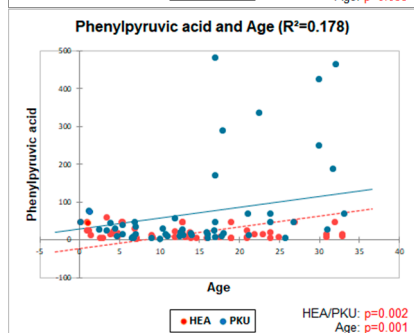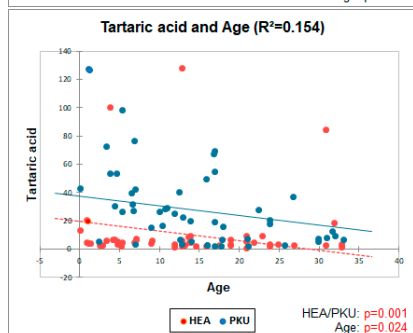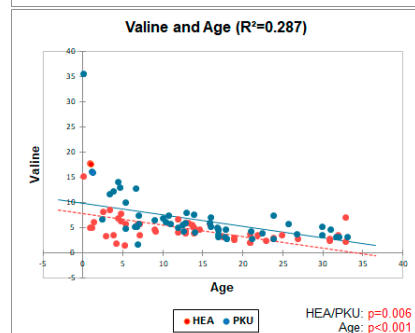

**Supplementary Figure S4.** Regression analysis between metabolites in urine (mmol/mol creatinine) and actual phenylalanine level in plasma ( $\mu\text{mol/l}$ ) and natural protein intake (g/kg body-weight/day). Significant regression in red ( $p < 0.05$ ).

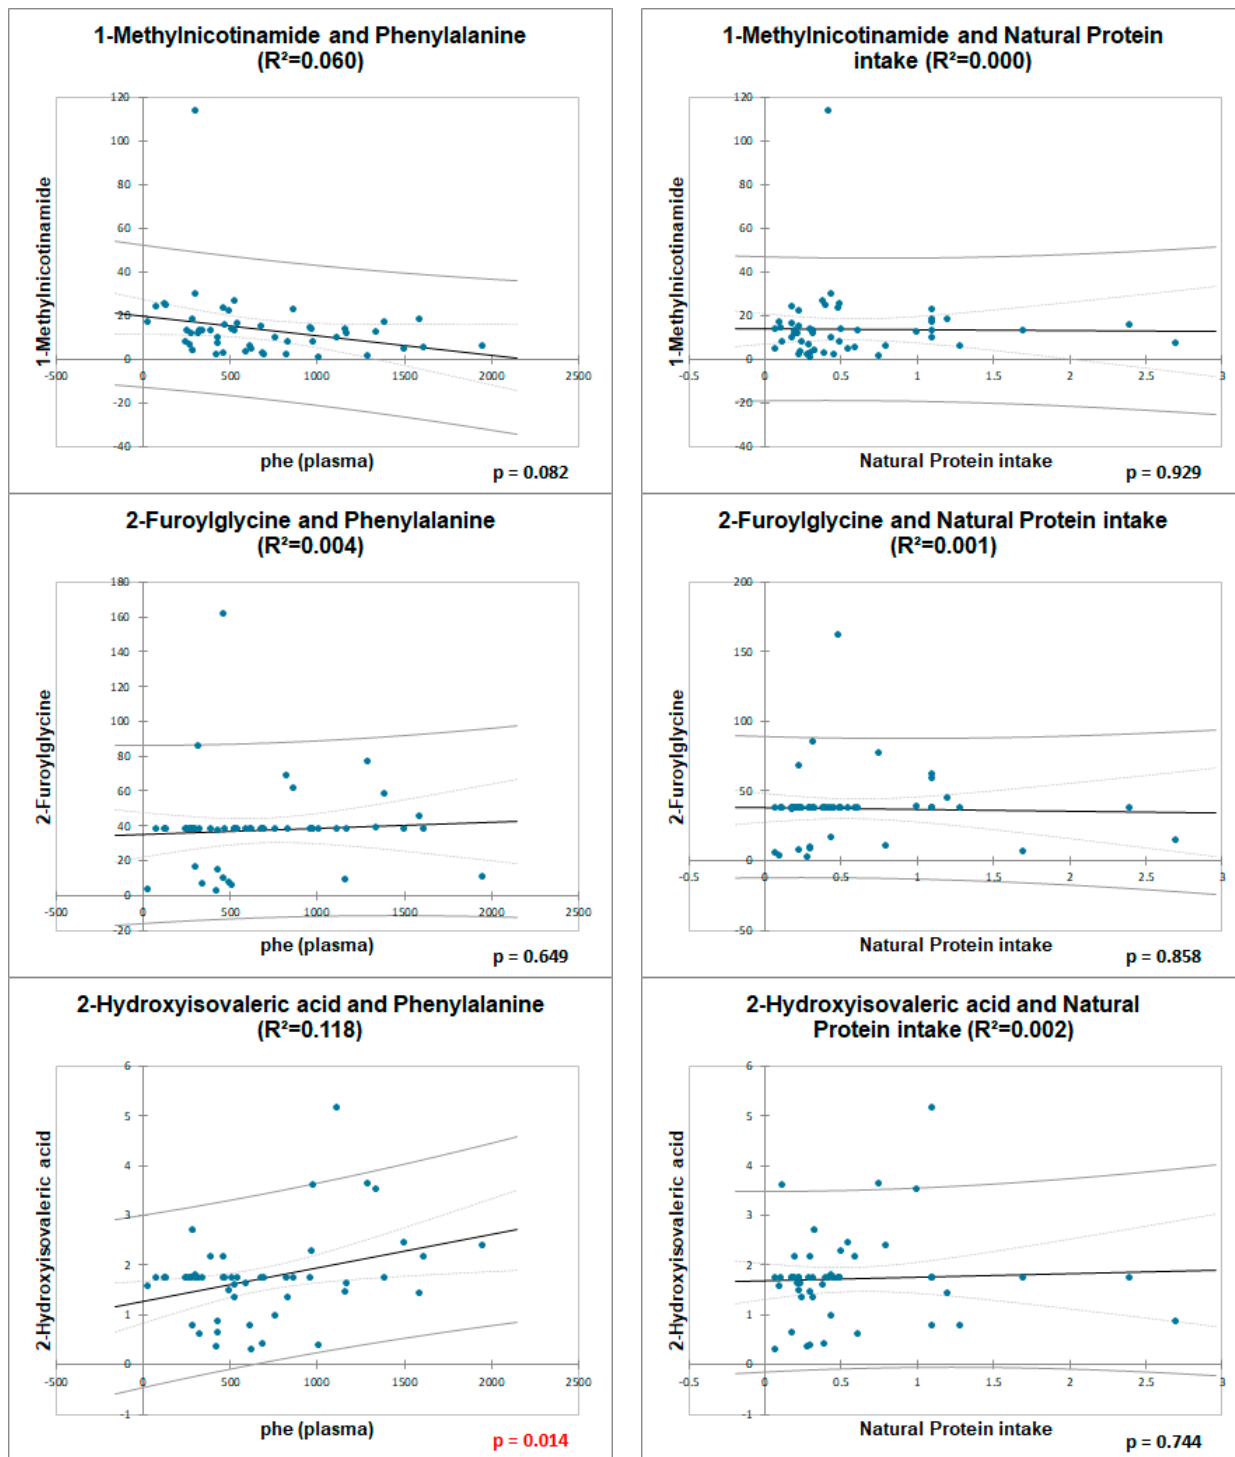



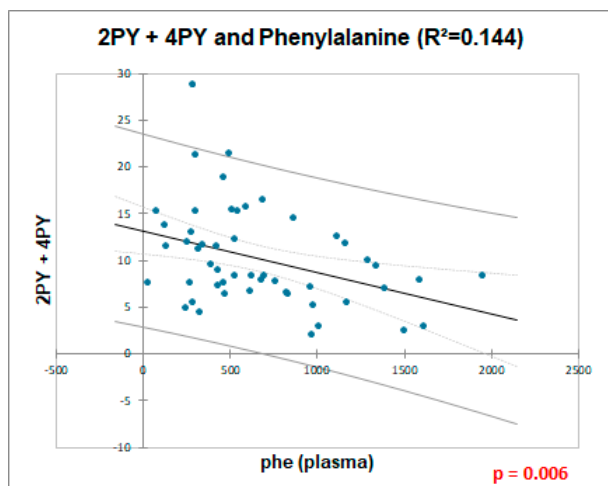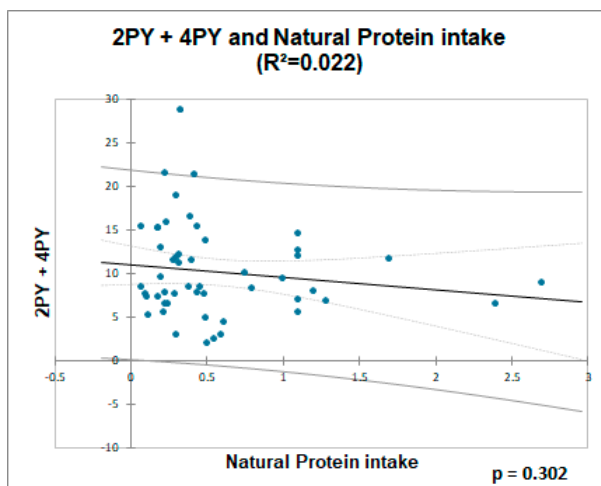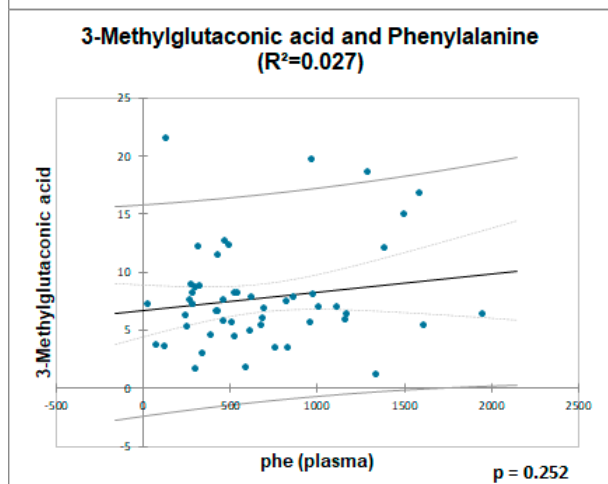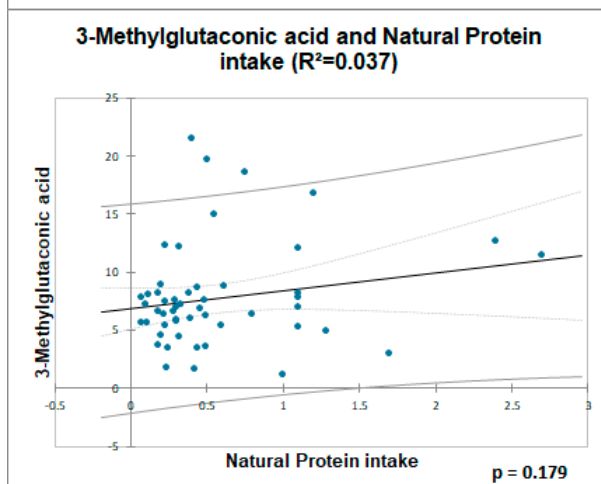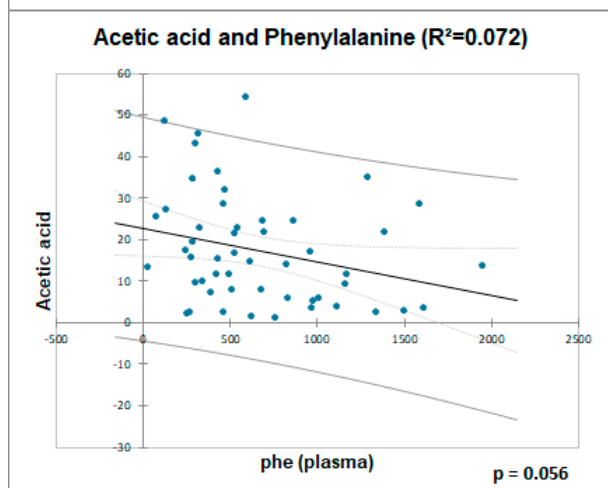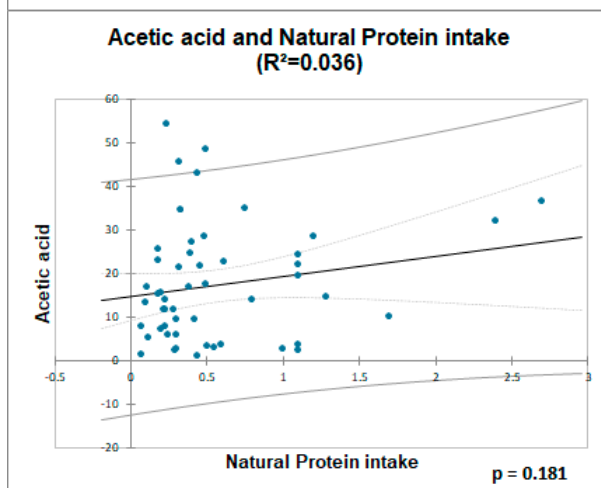

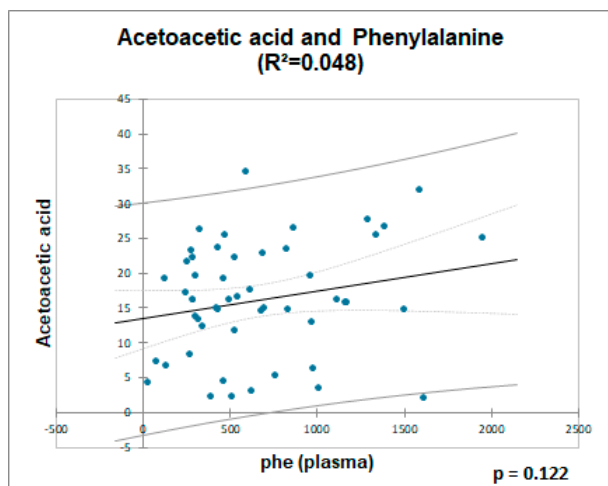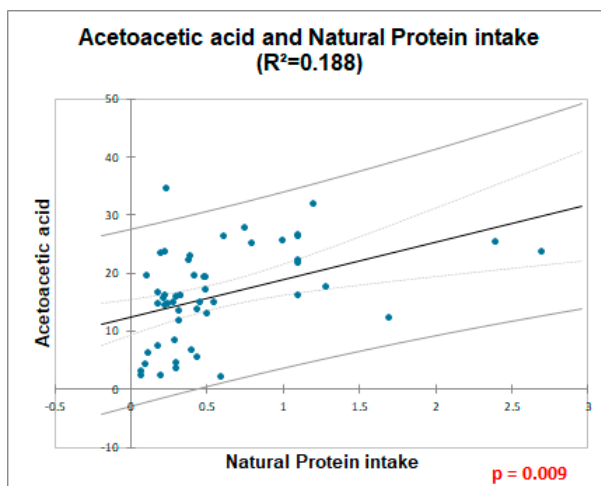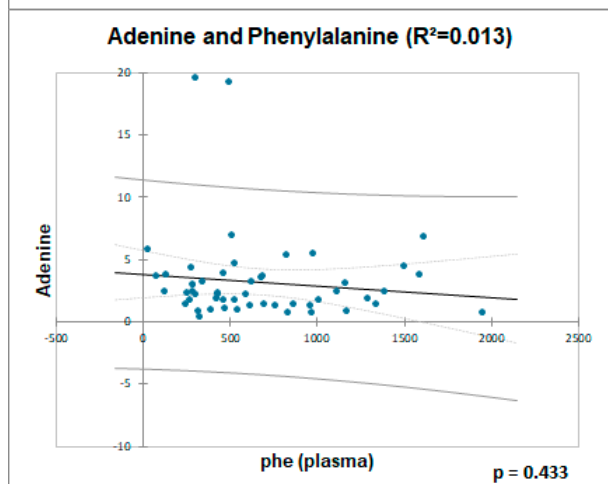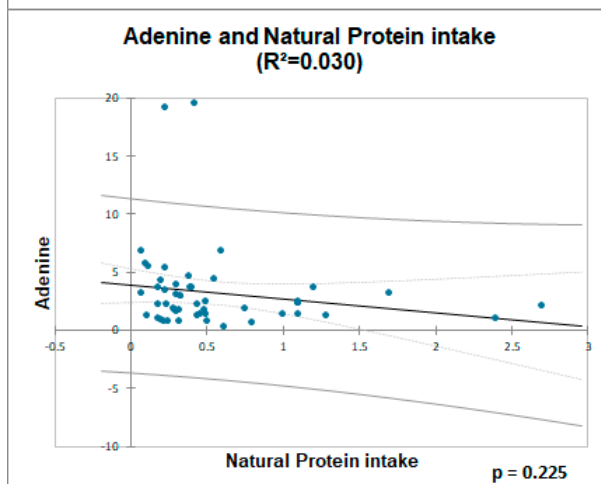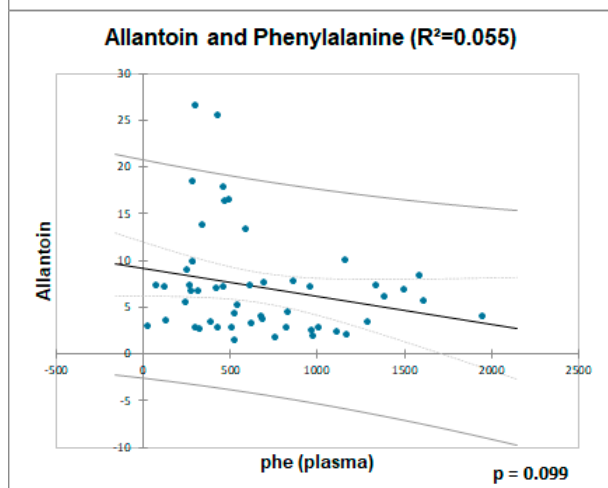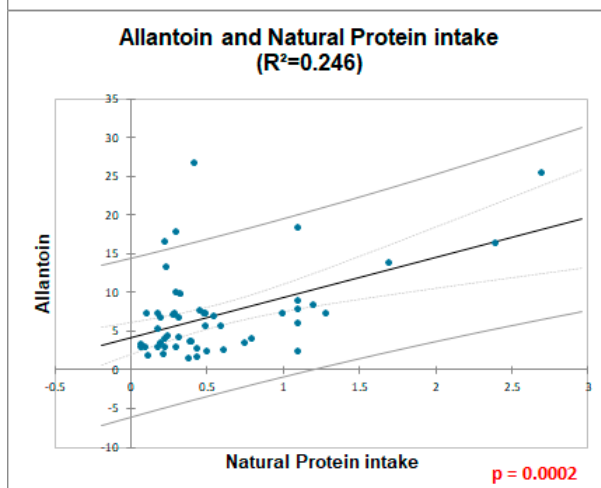

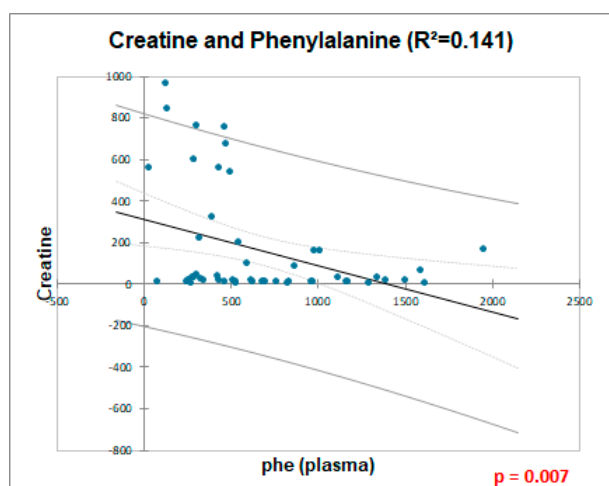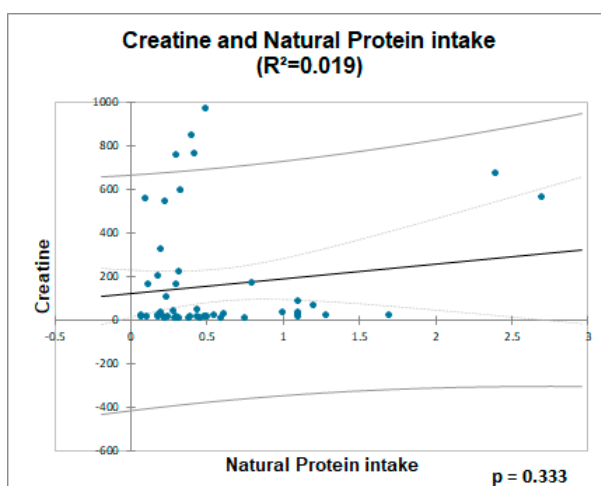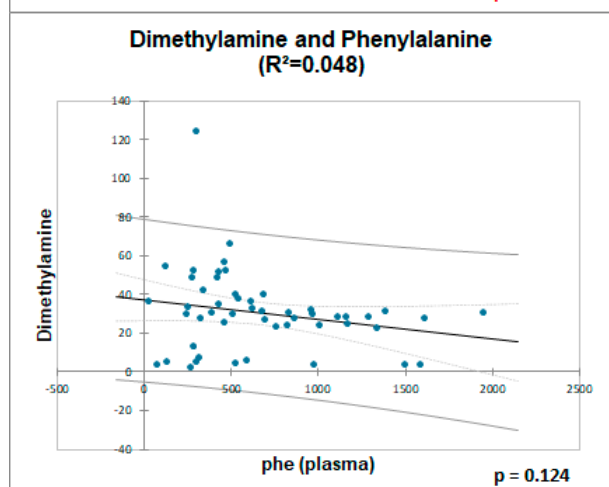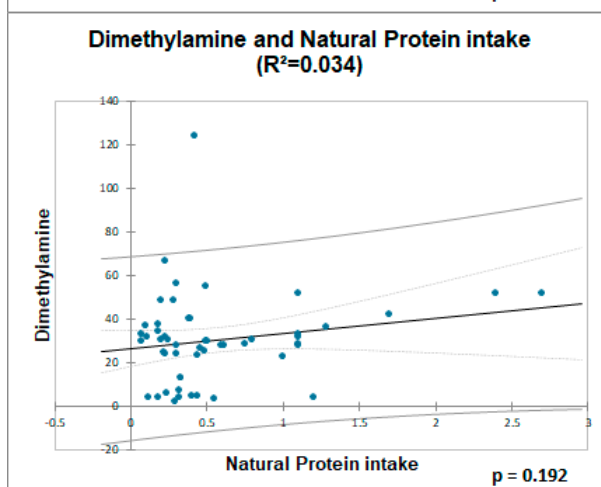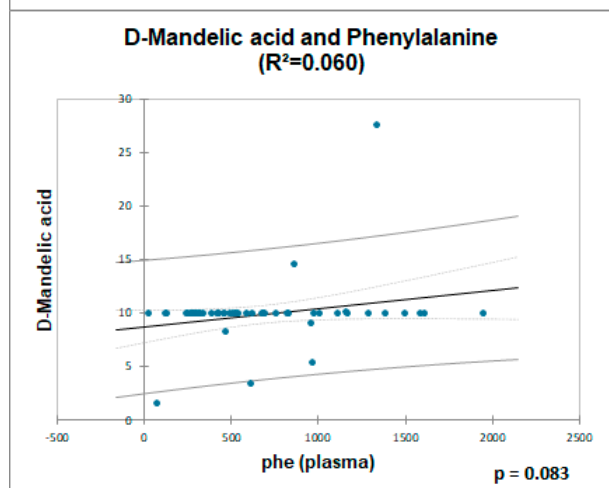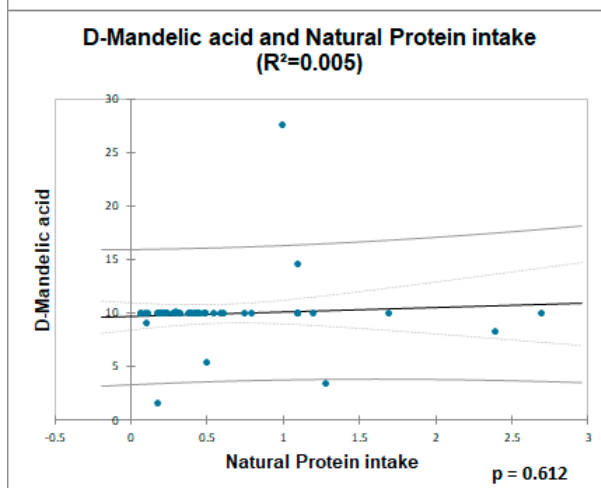

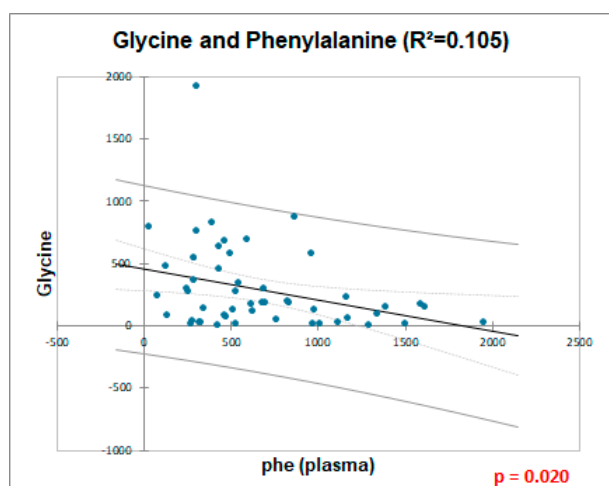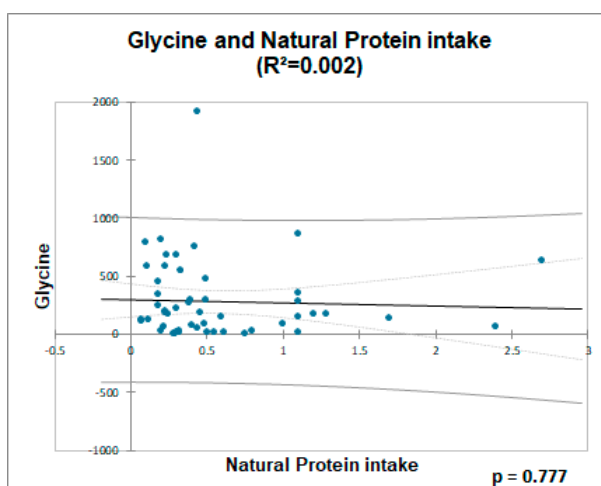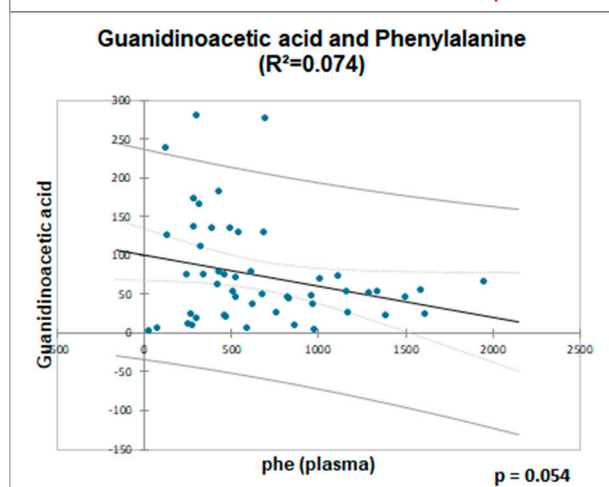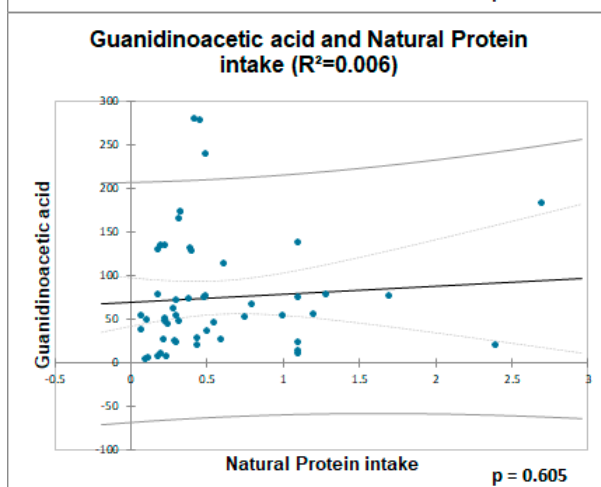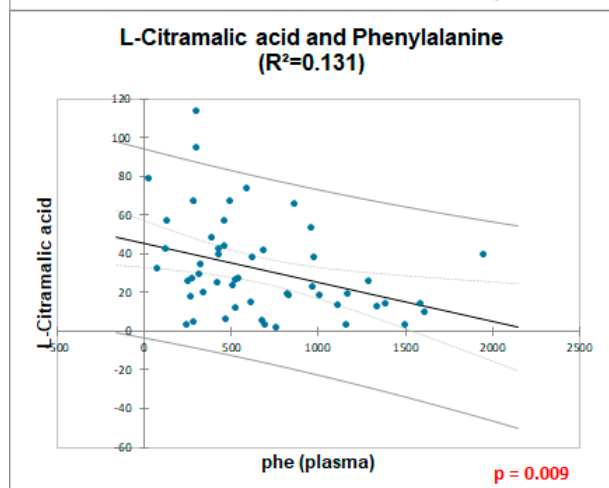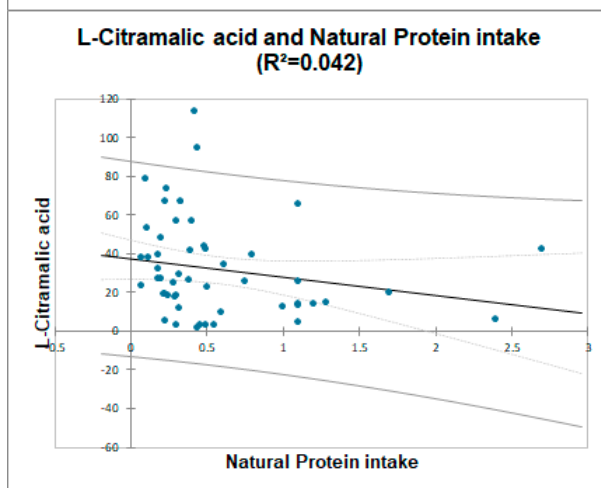

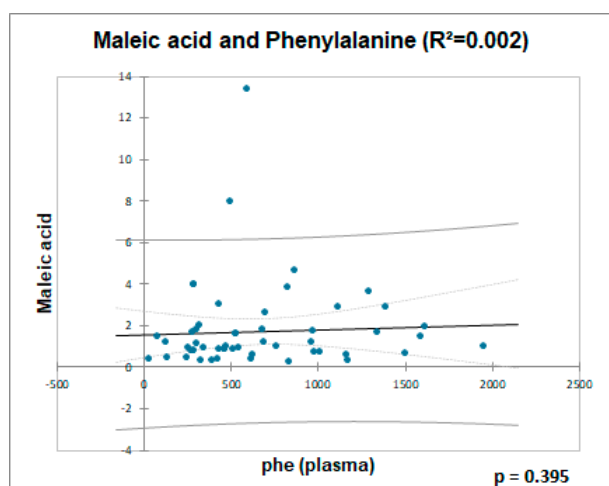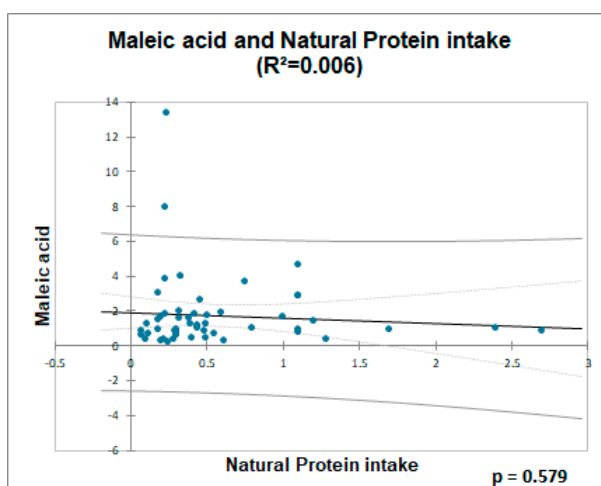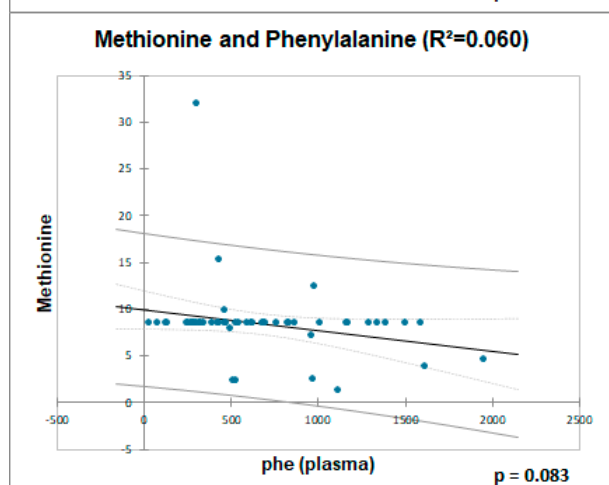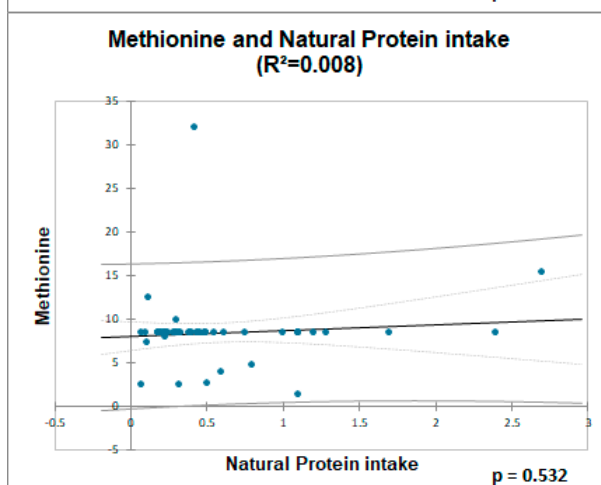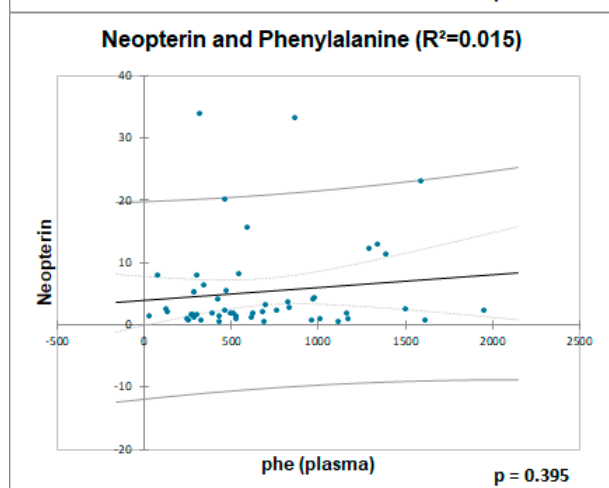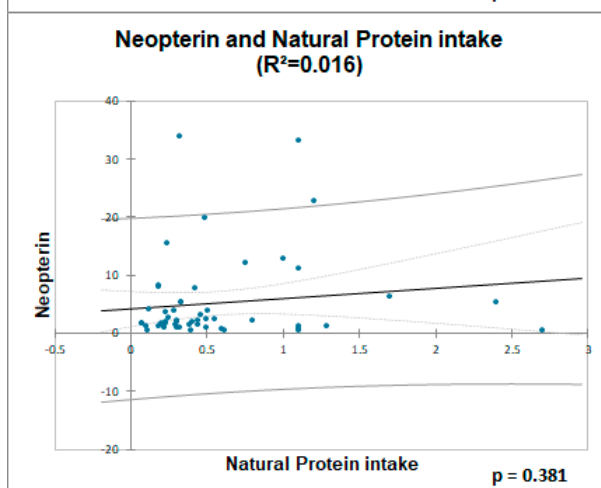

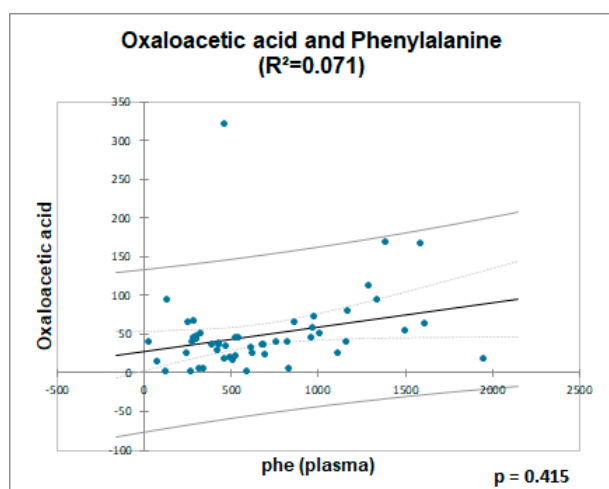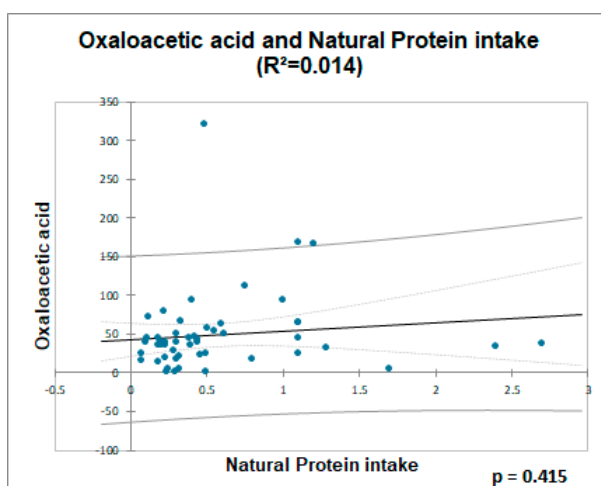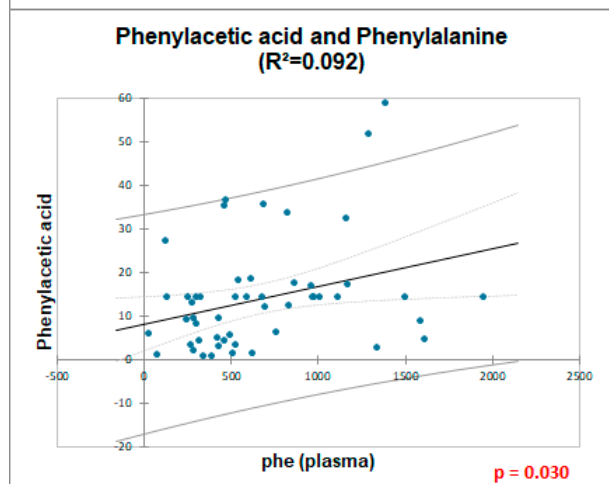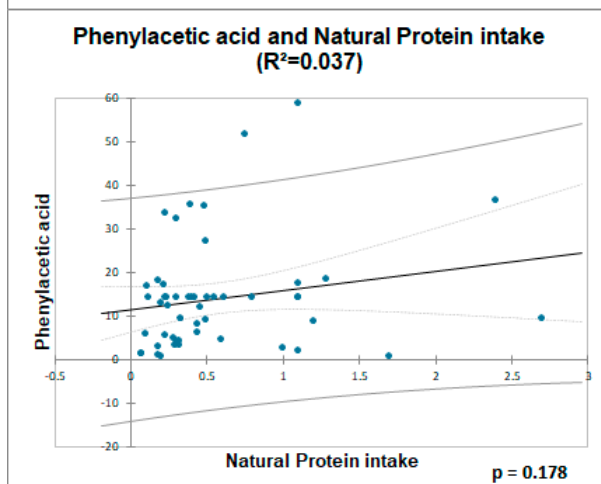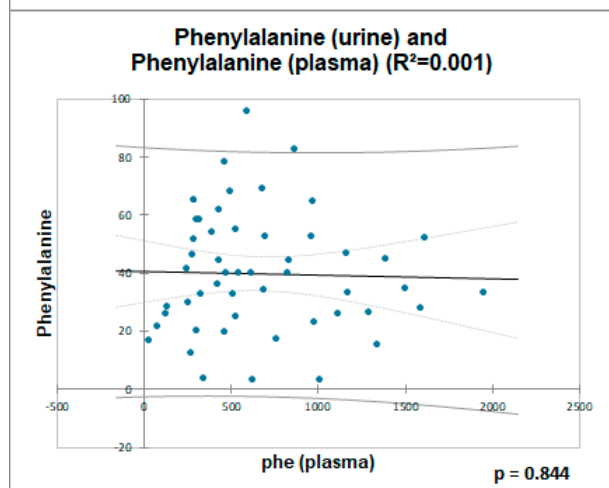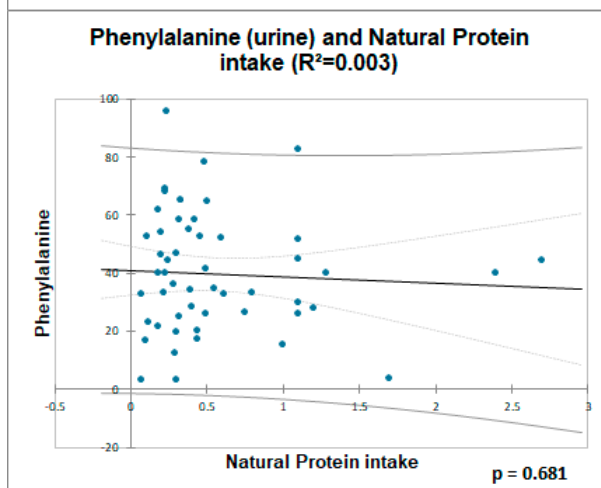

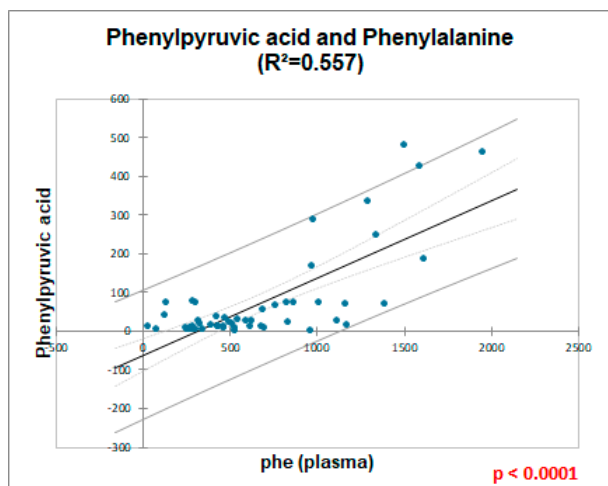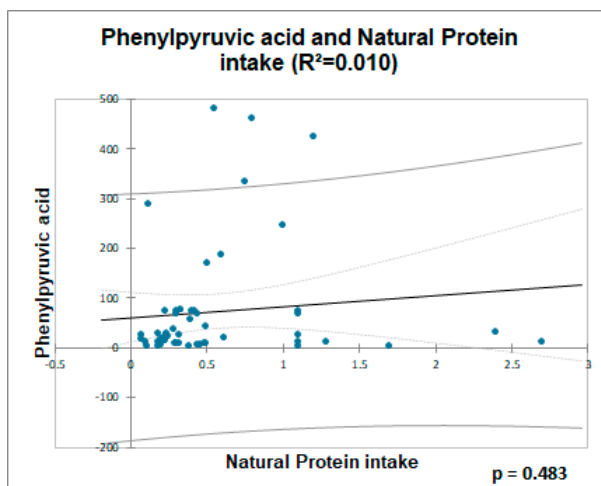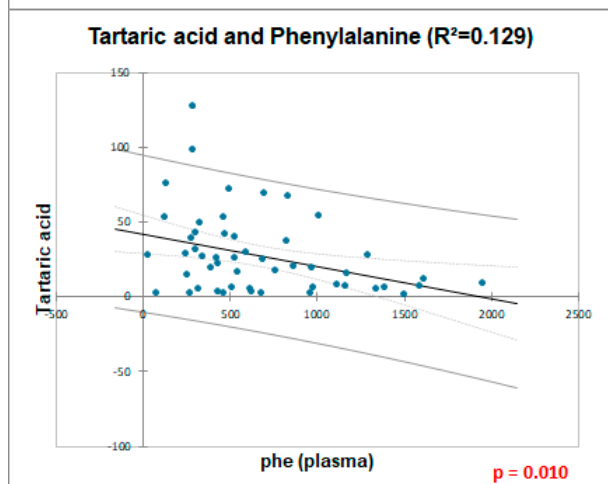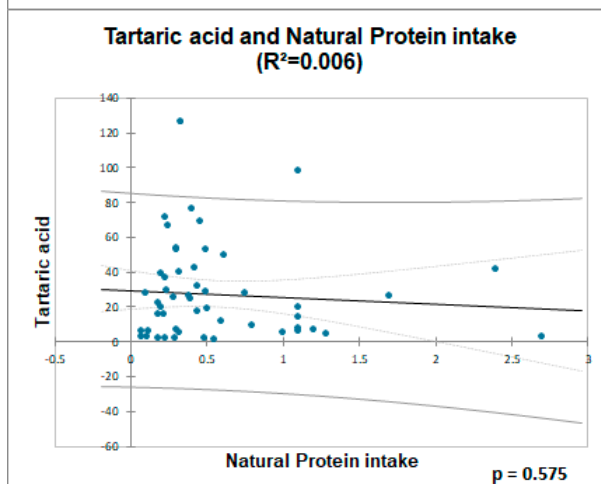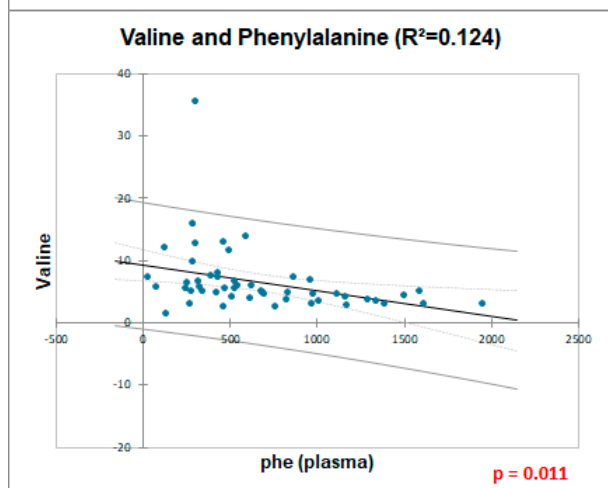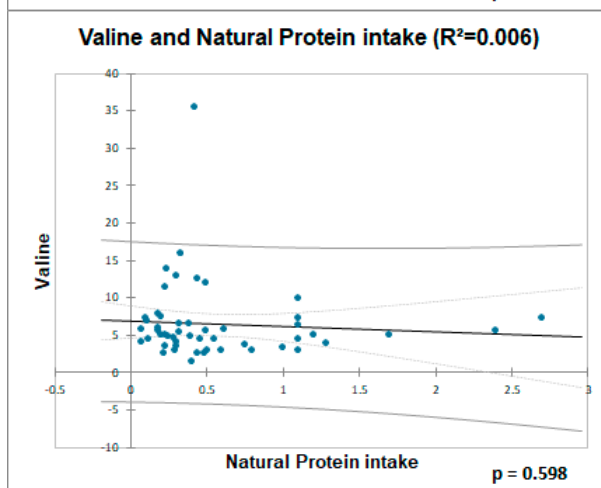

**Supplementary Figure S5.** Multifactorial analysis of metabolites using standard coefficient of variation. Blue: not significant, orange: significant.

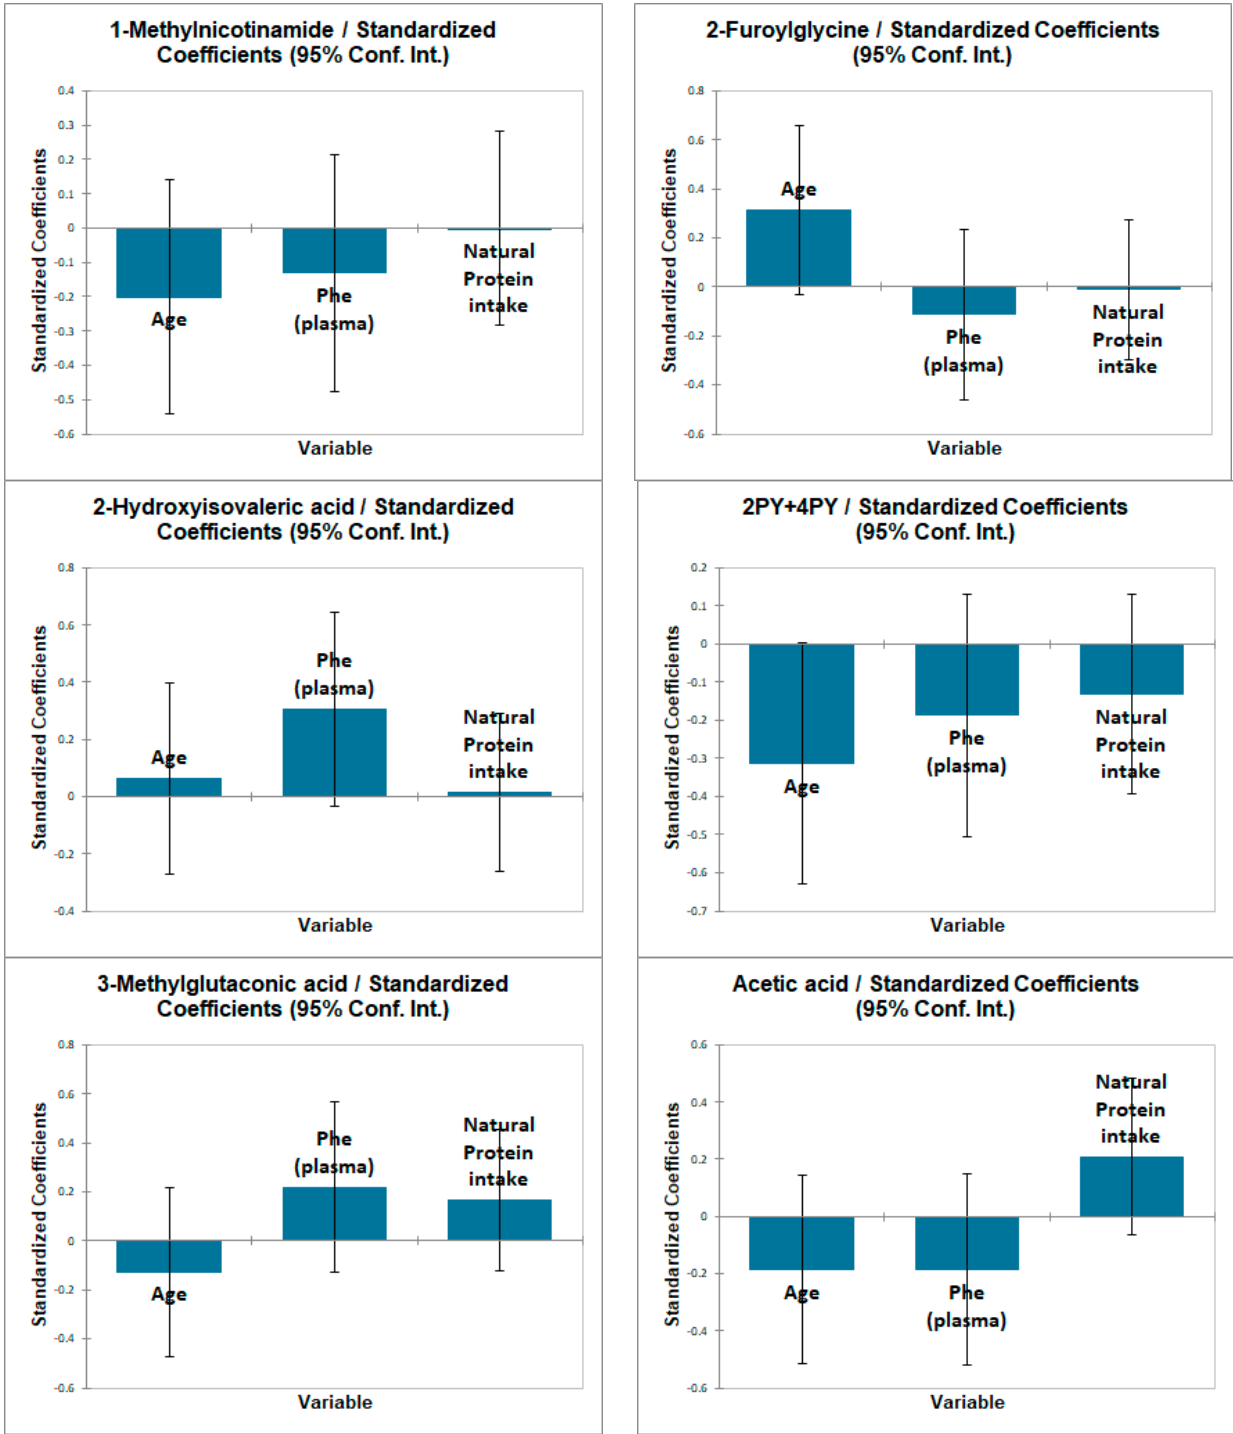



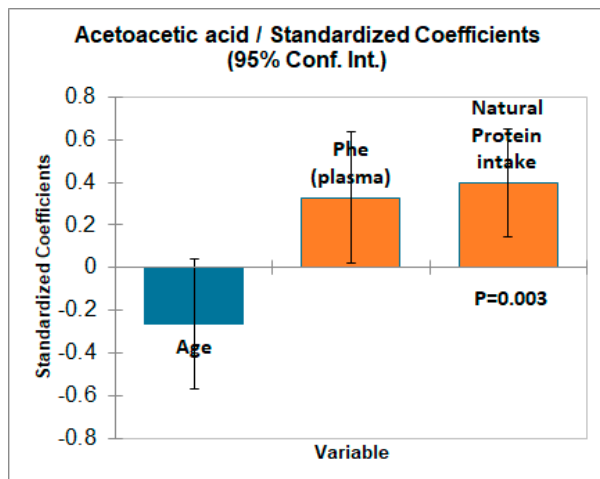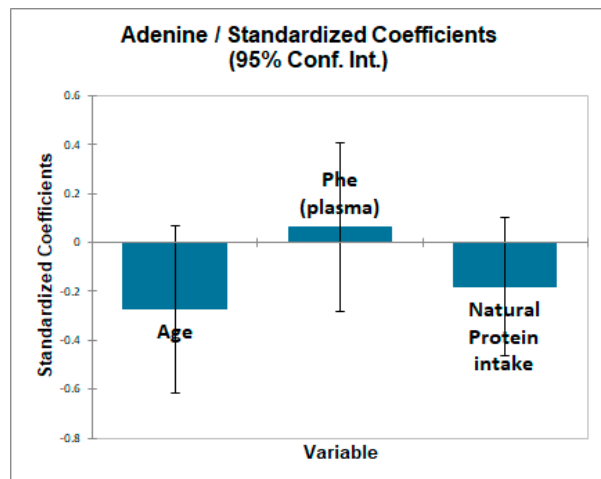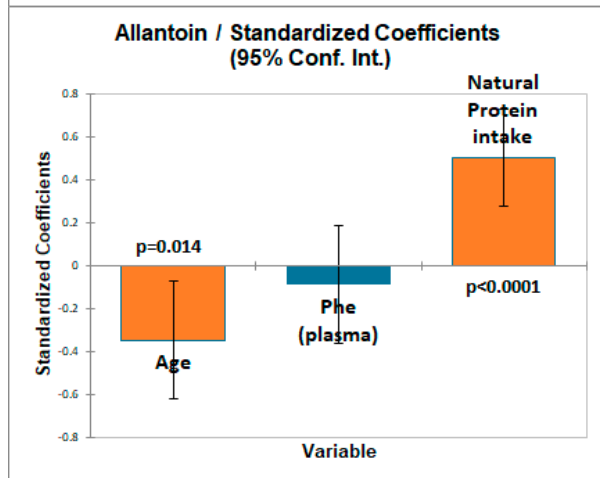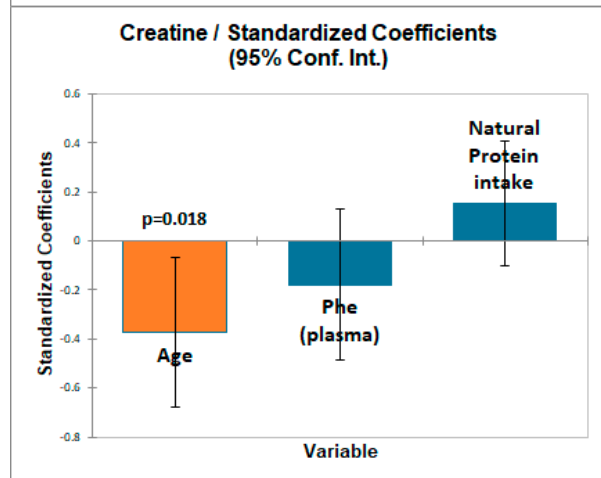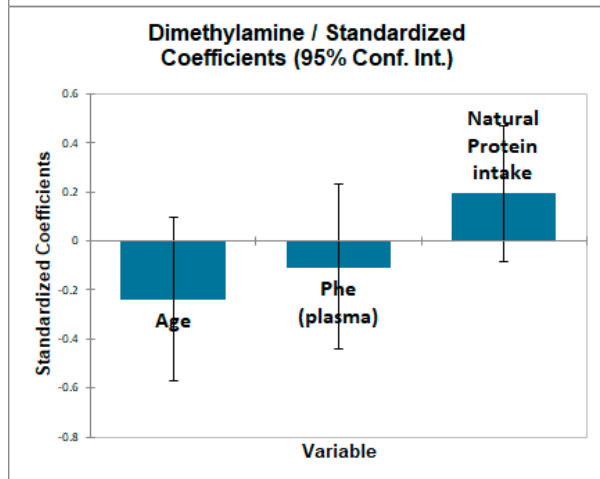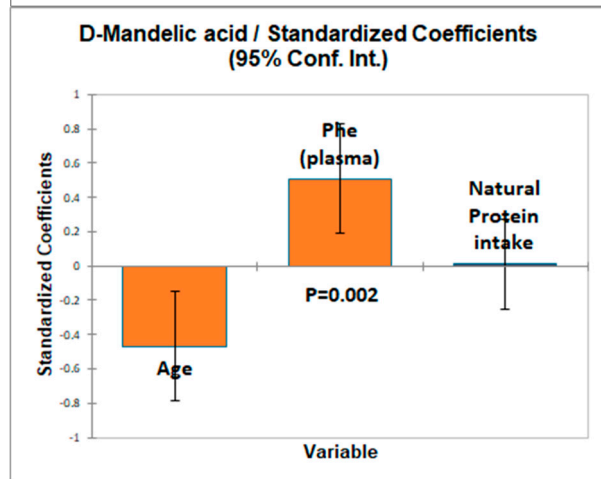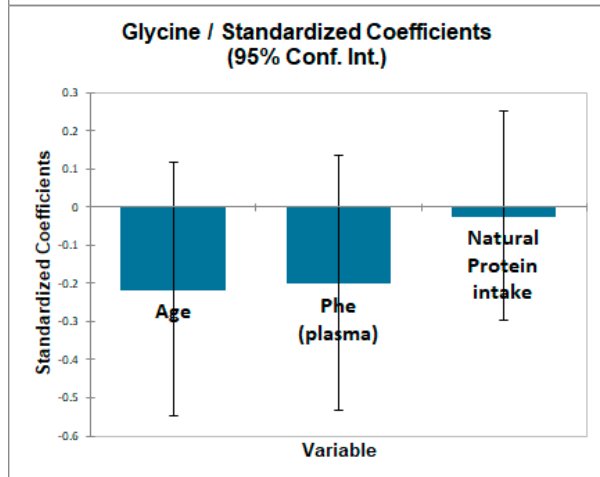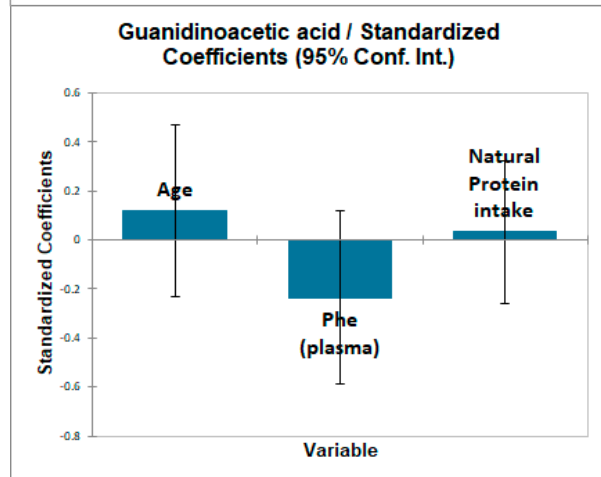

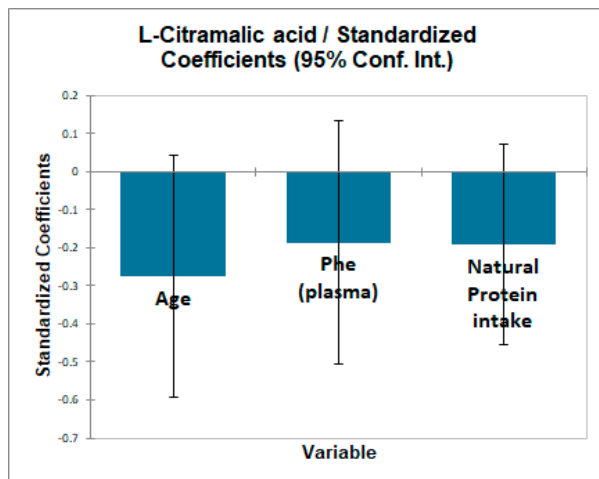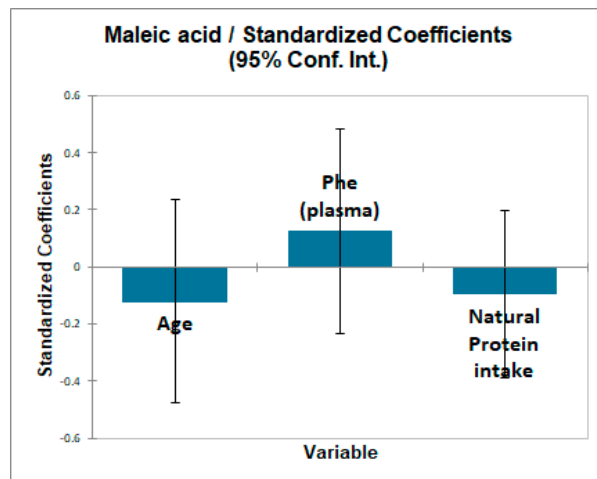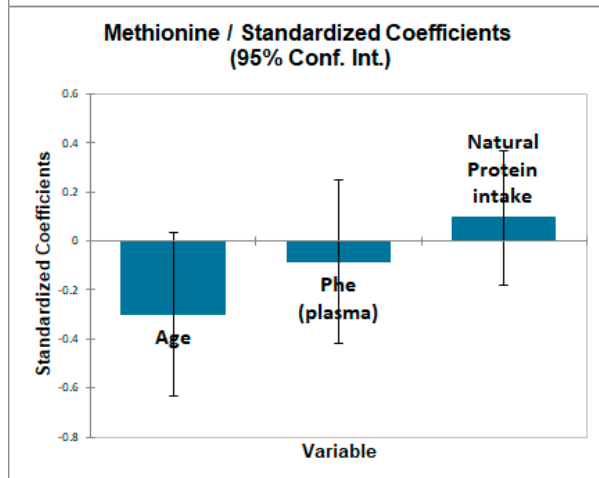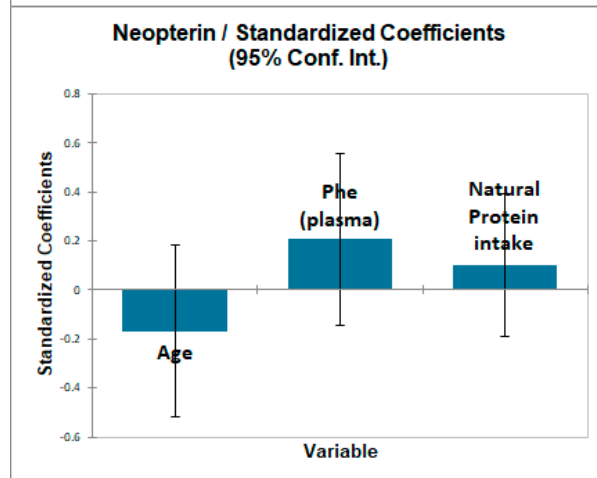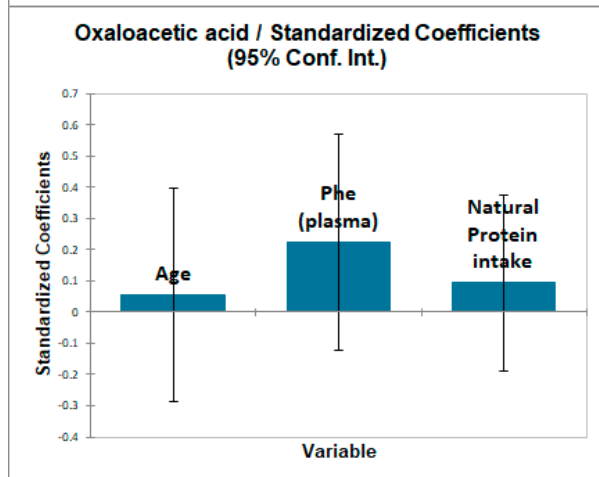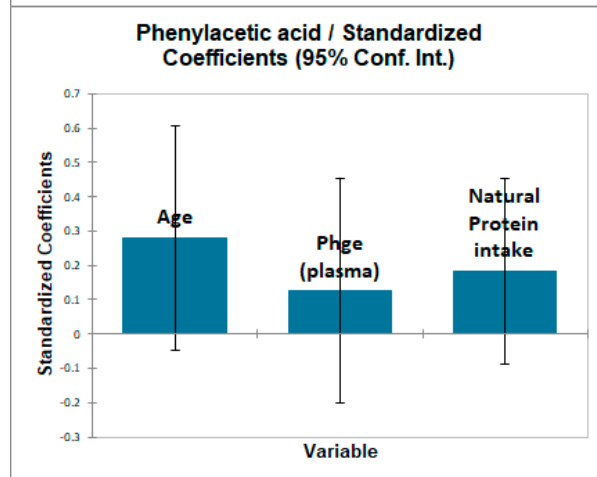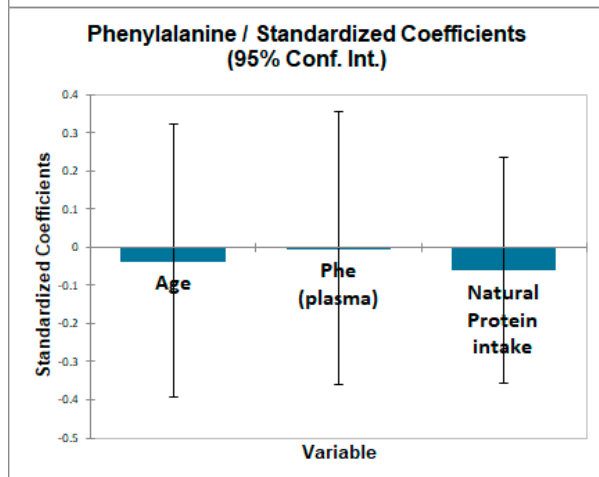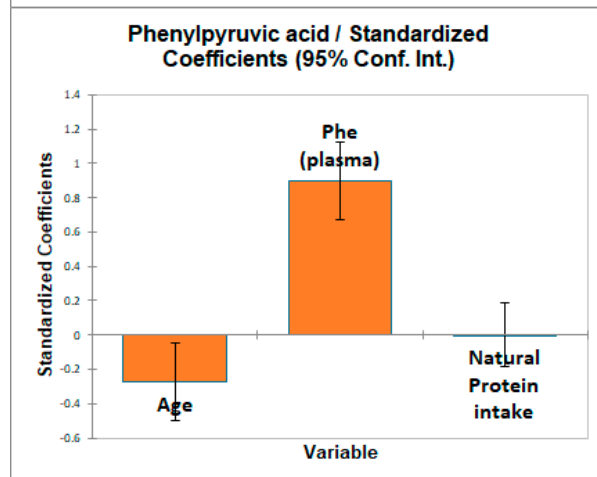

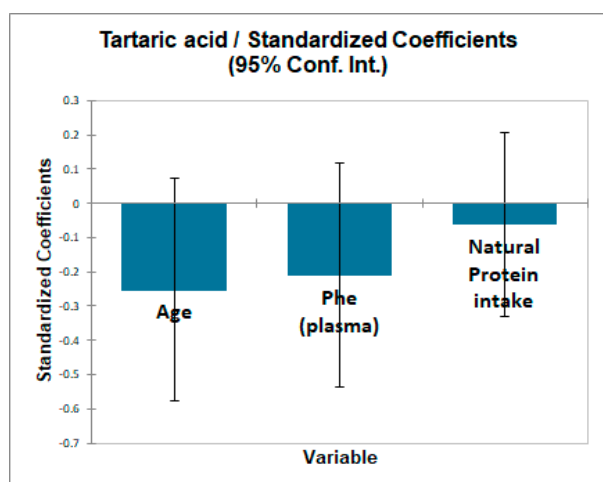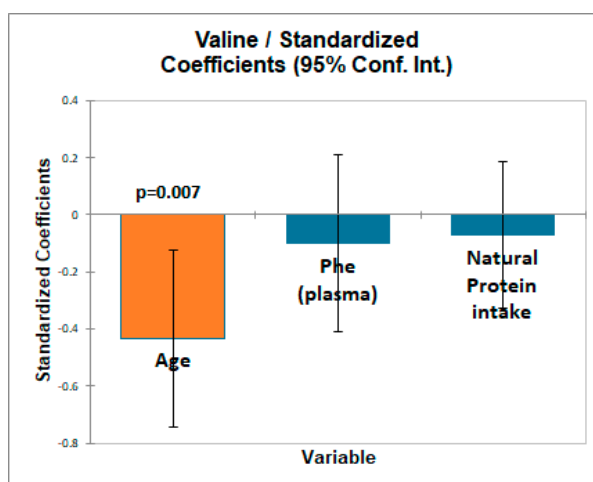

## Supplemental text: Method for identification of unknown metabolites with UPLC-MS

### Chemicals

Acetonitrile with 0.1% formic acid in LC-MS LiChrosolv quality was from Supelco. Water was prepared from a Milli-Q purification system from MerckMillipore. Ammonium acetate in LiChropure quality was from Supelco. Deuteriumoxide was from Deutero GmbH. N-Methyl-2-pyridone-5-carboxamide was from Sigma-Aldrich and N-Methyl-4-pyridone-3-carboxamide was from A2B Chem. Lithium formate was from Sigma-Aldrich.

### Sample preparation

For UPLC-MS measurements, 50µL aliquot of each urine in the study pooled for QC sample. In general, 50µL of urine sample was diluted with 150µL Milli-Q water and transferred into a 96 well plate.

For the isolation of the unknown marker, the urine was evaporated for 2h at room temperature in order to improve the concentration. The injection volume was 10µL. After isolation, the fractions were evaporated to dryness and re-constituted in the HILIC mobile phase at starting conditions. For cleaning of the pre-isolated fractions, the injection volume was 10µL.

### Instrumental

The UPLC System used for UPLC-MS-MS measurements and for pre-isolation and further cleaning of the fraction with HILIC chromatography was a Waters Acquity UPLC system (pump, sample manager, column manager, DA detector).

The column for LC-MSMS measurements was a Waters CORTECS T3 with a particle size of 2.7 $\mu$ m and a length of 100mm and an internal diameter of 3mm. The Mobile phase for LC-MSMS was A: water with 0.1% formic acid and B: acetonitrile with 0.1% formic acid. The flow rate was 0.25mL/min. The solvent gradient for LC-MSMS was: 0min, 100%A; 1.25min, 100%A; 6min, 90%A; 8min, 75%A; 10.5min, 25%A; 11min, 5%A; 11.5min, 5%A; 13.85min, 100%A.

The column for the pre-isolation step was a Waters BEH C18 with a particle size of 1.7 $\mu$ m, a length of 100mm and an internal diameter of 2.1mm. The mobile phase for the pre-isolation was A: water with 0.1% formic acid and B: acetonitrile with 0.1% formic acid. The flow rate was set to 0.25mL/min. The gradient for pre-isolation was: 0min, 100%A; 0.2min, 100%A; 12min, 60%A; 13min, 0%A; 14min, 0%A; 14.1min, 100%A; 16min, 100%A.

For cleaning of the pre-isolated fractions, an Xbridge HILIC column from Waters with a particle size of 3.5 $\mu$ m, a length of 100mm and an internal diameter of 4.6mm was used. The mobile phase for the cleaning step was: A: 90/10 ACN/100mM NH<sub>4</sub>Ac and B: 50/40/10 ACN/H<sub>2</sub>O/100mM NH<sub>4</sub>Ac. The flow rate was set to 0.25mL/min. The solvent gradient for the cleaning step was: equilibration time 10min; 0min, 100%A; 5min, 100%A; 20min, 0%A; 25min, 0%A.

The mass spectrometer used for the detection of the unknown metabolites was a Bruker Impact II operated in positive ESI mode with a scan range from 50-1300 m/z. The calibrant used was 20mM lithium formiate.

Fractions were cut from the chromatography using a Valco multi position valve with 28 positions. The evaporation of the urine samples and peak cuts was done with a Thermo Speedvac SPD120 connected to a Vacuubrand MD 4C Vario select membrane pump. The evaporated samples were re-constituted with deuterium oxide and transferred to a 5mm NMR tube.

NMR spectra were acquired on a Bruker Avance NEO 600MHz spectrometer equipped with a 5mm helium cooled TCI probe head. 1D and 2D NMR experiments derived from CMC-se parameter sets were acquired. The structures of the unknown metabolites were calculated with the CMC-se structure elucidation software from Bruker Biospin. The results were confirmed by comparison of the spectra acquired for the unknown metabolites to the spectra of pure reference compounds purchased.
